# Supplementary material
Source: PubMed Central journal article supplement (PMC5669567)
Supplement: jci-127-90499-s001.pdf [file jci-127-90499-s001.pdf]

**Supplemental Table 1: Intrinsic Immune Genes**

| Human   |         |          |
|---------|---------|----------|
| BCL10   | GCLC    | PARK7    |
| BCL2    | GPX1    | PIK3CA   |
| BCL2A1  | GSTP1   | POR      |
| BCL6    | GZMB    | REL      |
| BIK     | HMOX1   | RELB     |
| BIRC2   | IKBKE   | RIPK1    |
| CAT     | IL15    | RIPK2    |
| CCL13   | IL16    | RNF31    |
| CCL17   | IL18    | SOCS3    |
| CCL18   | IL1B    | SOD1     |
| CCL19   | IL1R1   | STAT1    |
| CCL2    | IL2RA   | STAT4    |
| CCL21   | IL6     | STAT6    |
| CCL22   | IRAK1   | TLR2     |
| CCL24   | IRF1    | TNF      |
| CCL26   | IRF3    | TNFAIP3  |
| CCL27   | IRF4    | TNFRSF18 |
| CCL5    | IRF6    | TNFRSF1A |
| CCR2    | IRF8    | TNFRSF1B |
| CCR5    | LTBR    | TNFSF4   |
| CD40    | MAP2K1  |          |
| CDKN1A  | MAP2K2  |          |
| CDKN1B  | MAP2K4  |          |
| CEBPB   | MAP3K14 |          |
| CHUK    | MAPK1   |          |
| CXCL1   | MAPK13  |          |
| CXCL12  | MMP1    |          |
| CXCL13  | MMP10   |          |
| CXCL16  | MMP2    |          |
| CXCL2   | MMP7    |          |
| CXCL5   | MYC     |          |
| CXCL9   | NCF1    |          |
| CXCR3   | NFE2L2  |          |
| CYBB    | NFKB1   |          |
| CYP2A13 | NFKB2   |          |
| DDX58   | NFKBIA  |          |
| ELK1    | NLRP3   |          |
| EPHX1   | NOD1    |          |
| FAS     | NOS3    |          |
| FOS     | NPM1    |          |
| GATA3   | NQO1    |          |

| Mouse             |         |          |
|-------------------|---------|----------|
| BCL10             | EPHX1   | NLRP3    |
| BCL2              | FAS     | NOD1     |
| BCL2a1a           | FOS     | NOS3     |
| BCL2a1b           | GATA3   | NPM1     |
| BCL2a1d           | GCLC    | NQO1     |
| BCL6              | GPX1    | PARK7    |
| BIK               | GSTP1   | PIK3CA   |
| BIRC2             | GZMB    | POR      |
| CAT               | HMOX1   | REL      |
| CCL21             | IKBKE   | RELB     |
| CCL17             | IL15    | RIPK1    |
| CCL19             | IL16    | RIPK2    |
| CCL2              | IL18    | RNF31    |
| CCL21a            | IL1B    | SOCS3    |
| CCL22             | IL1R1   | SOD1     |
| CCL24             | IL2RA   | STAT1    |
| CCL26             | IL6     | STAT4    |
| CCL27a            | IRAK1   | STAT6    |
| CCL3              | IRF1    | TLR2     |
| CCL5              | IRF3    | TNF      |
| CCR2              | IRF4    | TNFAIP3  |
| CCR5              | IRF6    | TNFRSF18 |
| CD40              | IRF8    | TNFRSF1A |
| CDKN1A            | JUN     | TNFRSF1B |
| CDKN1B            | LTBR    | TNFSF4   |
| CEBPB             | MAP2K1  |          |
| CHUK              | MAP2K2  |          |
| CXCL1             | MAP2K4  |          |
| CXCL12            | MAP3K14 |          |
| CXCL13            | MAPK1   |          |
| CXCL16            | MAPK13  |          |
| CXCL2             | MMP10   |          |
| CXCL5             | MMP1a   |          |
| CXCL9             | MMP2    |          |
| CXCR3             | MMP7    |          |
| CYBB              | MYC     |          |
| CYP2a12/CYP2a22   | NCF1    |          |
| CYP2a4            | NFE2I2  |          |
| CYP2a5/CYP2a21-ps | NFKB1   |          |
| DDX58             | NFKB2   |          |
| ELK1              | NFKBIA  |          |

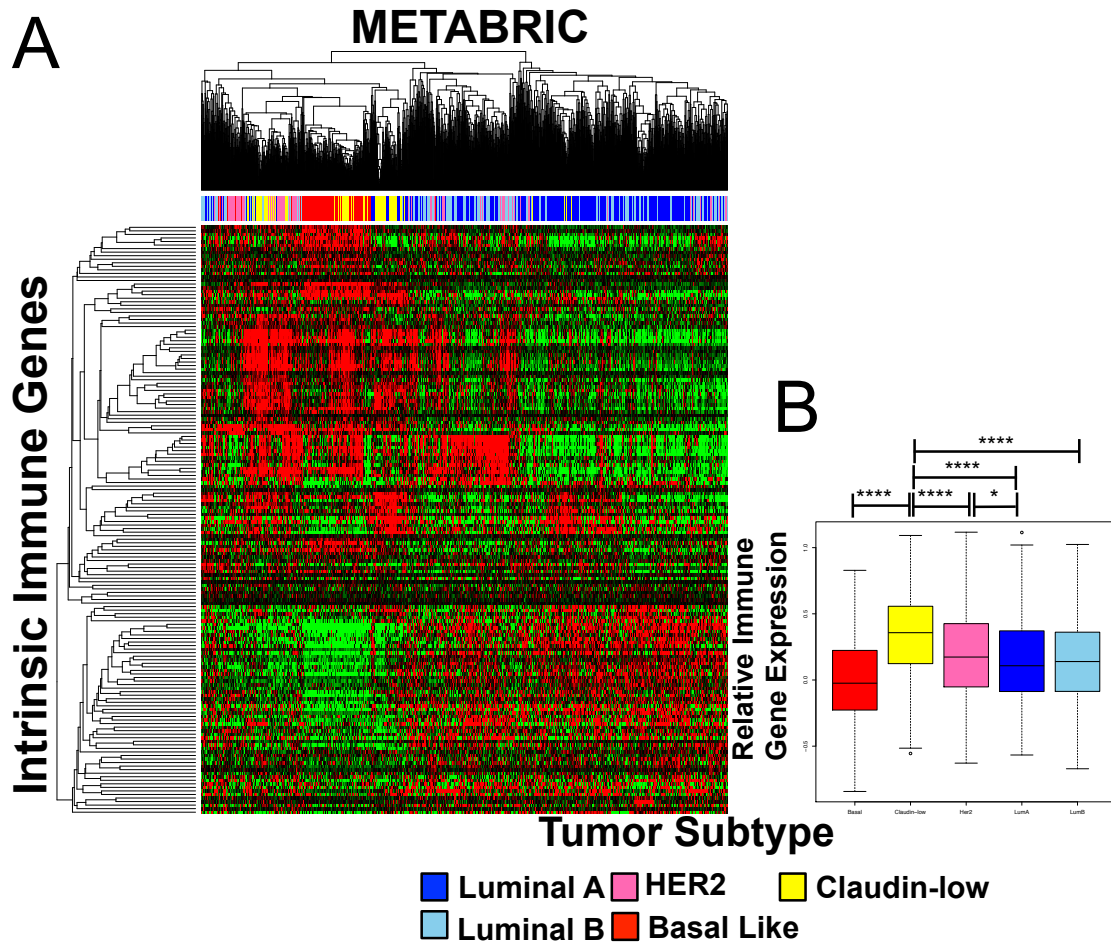

**Supplemental Figure S1: Human tumor subtypes exhibit differential immune gene expression. (A)** Unsupervised hierarchical clustering of breast cancer samples from METABRIC by intrinsic immune gene list. **(B)** Overall expression of the immune gene signature by each subtype. Statistical significance determined by Kruskal-Wallis test, with Dunn's post-test for multiple comparisons (n=1,981). \* denotes  $p < 0.05$ , \*\*\*\* denotes  $p < 0.0001$ .

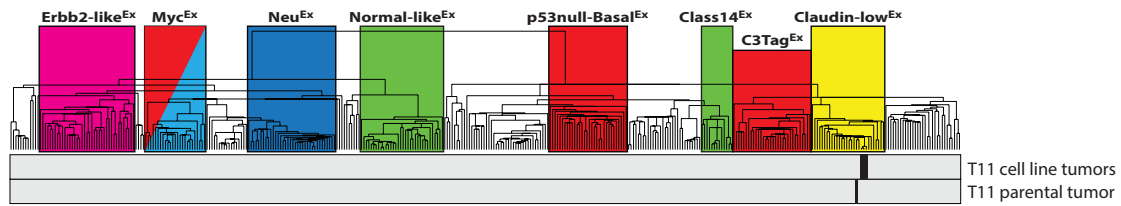

**Supplemental Figure S2: Tumors derived from T11 cell line result in true claudin-low tumors.** Three T11 cell line-derived tumors were normalized to a 385 microarray dataset consisting of tumors from 27 murine models of breast carcinoma and normal mammary tissue [21]. A supervised cluster using murine intrinsic genes was performed, with the sample dendrogram displayed. The eight murine classes identified as human subtype counterparts are highlighted. The cluster locations of the T11 parental tumor and the three T11 cell line derived tumors, which had a dendrogram correlation of 0.84, are displayed below the dendrogram as black lines.

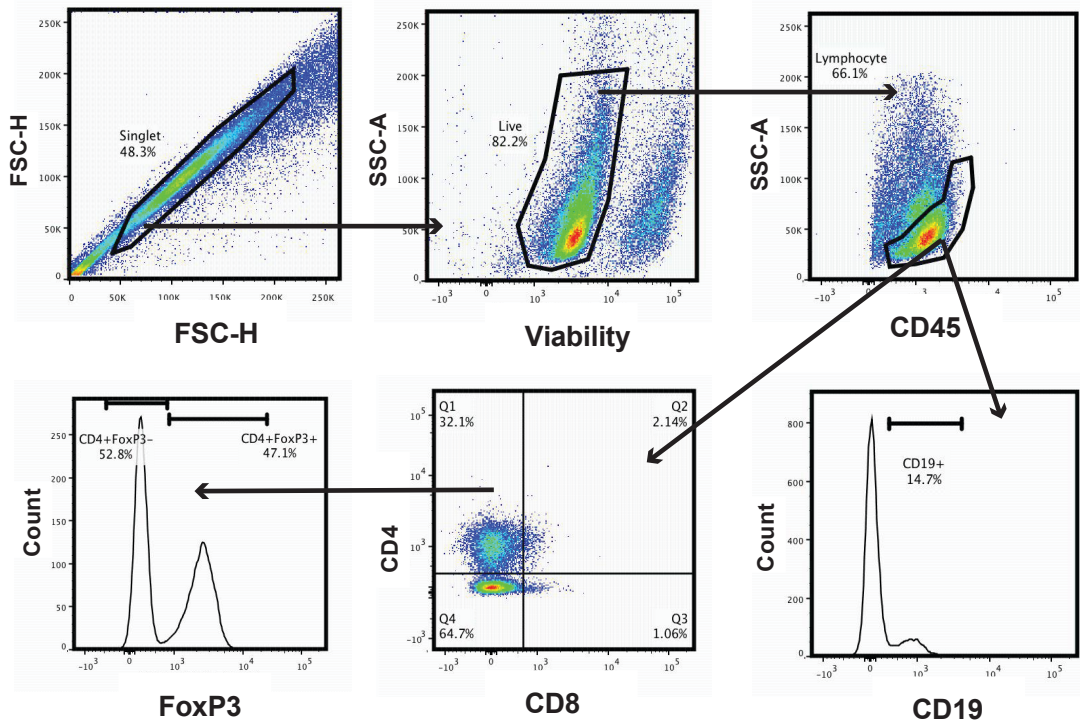

**Supplemental Figure S3: Representative FACS analysis diagram.** Shown is a representative gating schema for the FACS analysis of tumor-infiltrating lymphocytes from an untreated 20 mm<sup>2</sup> T11 tumor. Following generation of single-cell suspensions from tumor tissue and enrichment for leukocytes by density-gradient centrifugation, samples were analyzed by FACS. Viable CD45<sup>+</sup> cells were gated on CD8 and CD19 to enumerate cytotoxic T cells and B cells respectively, and CD4<sup>+</sup> cells were analyzed for FoxP3 expression to enumerate helper T cells (CD4<sup>+</sup>FoxP3<sup>-</sup>) and regulatory T cells (CD4<sup>+</sup>FoxP3<sup>+</sup>).

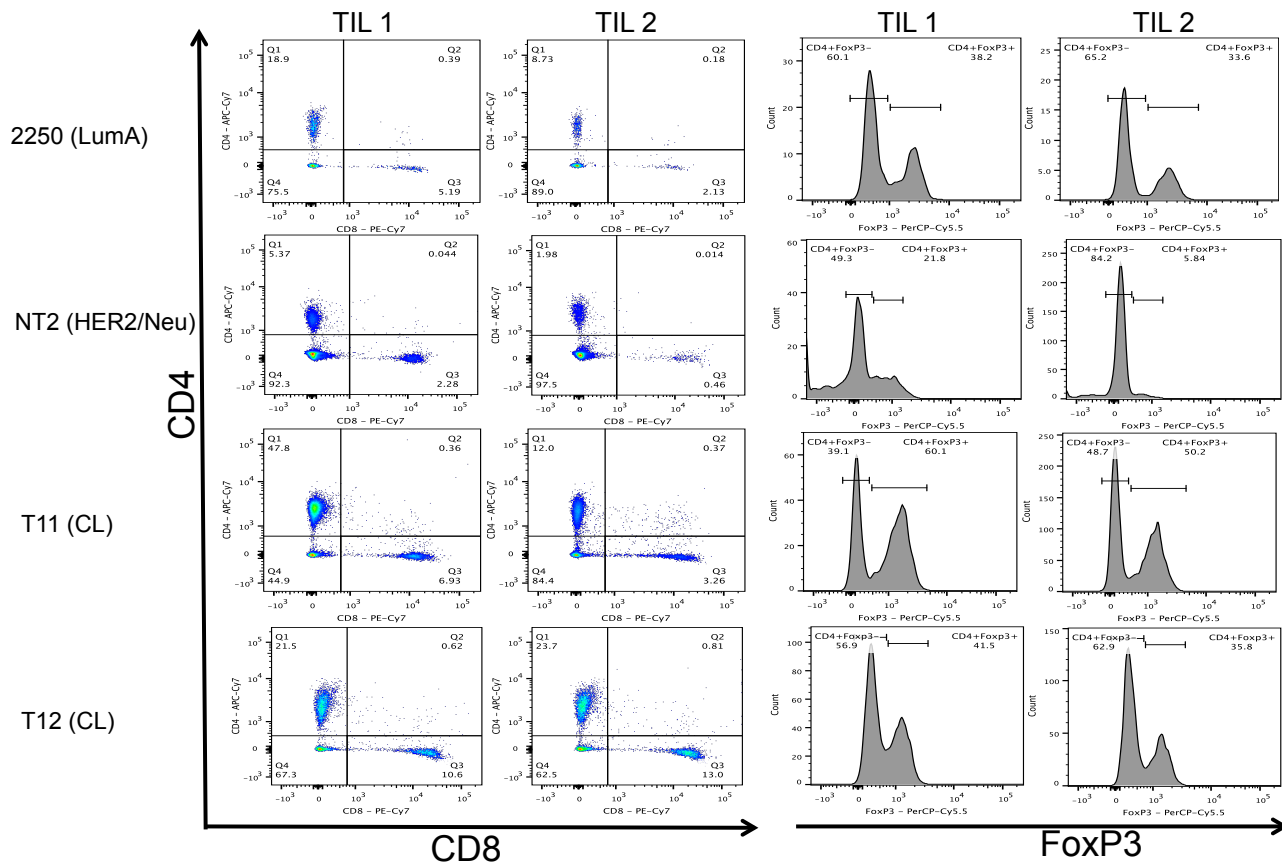

**Supplemental Figure S4: Representative FACS plots of tumor infiltrating lymphocytes.** WT mice were injected with  $1 \times 10^6$  2250 tumor cells or  $1 \times 10^4$  T11 or T12 cells. Neu-N mice were injected with  $5 \times 10^4$  NT2 cells. Tumors were harvested at  $100\text{mm}^2$  (2250 n=10, NT2 n=5, T11 n=10, T12=6), digested, enriched for lymphocytes, and analyzed by FACS. Data are representative of data presented in Figure 2.

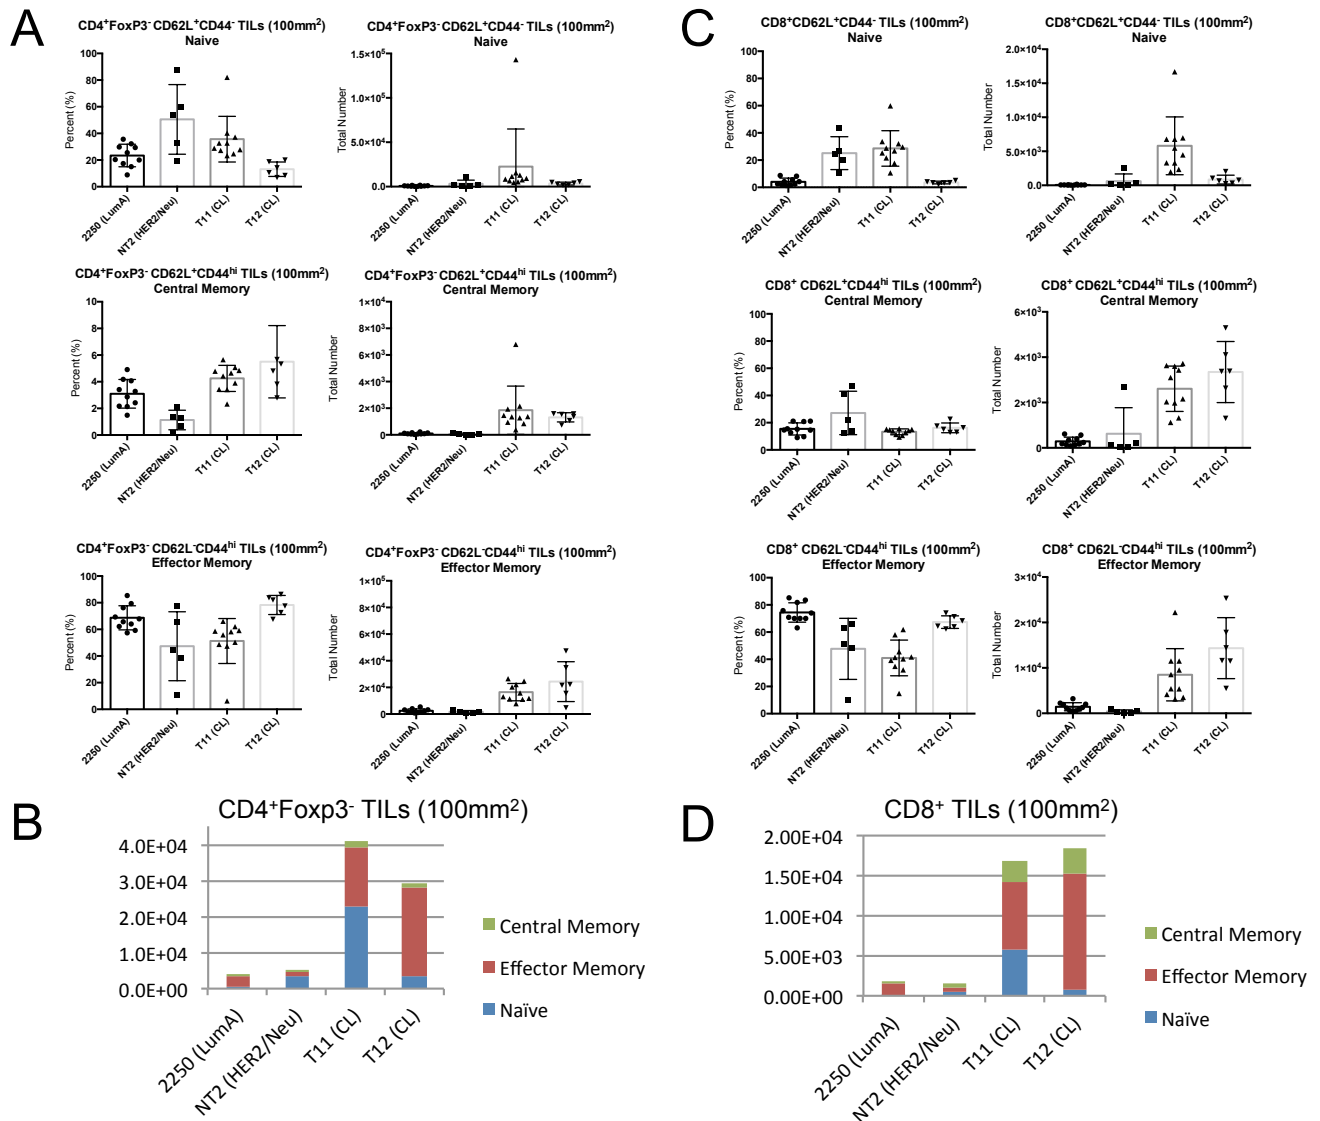

**Supplemental Figure S5: CD4<sup>+</sup> and CD8<sup>+</sup> T cell activation subsets.** WT mice were injected with  $1 \times 10^6$  2250 tumor cells or  $1 \times 10^4$  T11 or T12 cells. Neu-N mice were injected with  $5 \times 10^4$  NT2 cells. Tumors were harvested at 100 mm<sup>2</sup> (2250 n=10, NT2 n=5, T11 n=10, T12=6), digested, enriched for lymphocytes, and analyzed by FACS. CD62L<sup>+</sup>CD44<sup>lo</sup> T cells are considered naïve; CD62L<sup>+</sup>CD44<sup>hi</sup> T cells are considered activated or central memory; and CD62L<sup>-</sup>CD44<sup>hi</sup> T cells are considered effector memory. **(A)** Percent and total number naïve, central memory, and effector memory CD4<sup>+</sup>Foxp3<sup>-</sup> T cells. **(B)** Total number of each cell type from **(A)** graphed as a stacked column bar graph. **(C)** Percent and total number naïve, central memory, and effector memory CD8<sup>+</sup> T cells. **(D)** Total number of each cell type from **(C)** graphed as a stacked column bar graph.

**A****T12 (Claudin-low) Tumor Growth Curve with Checkpoint Inhibition**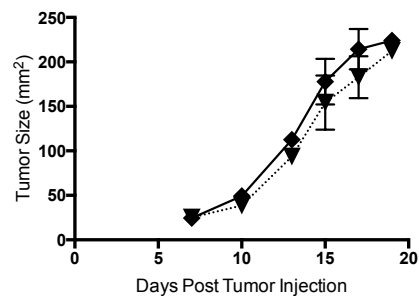**B****T12 (Claudin-low) Survival Curve with Checkpoint Inhibition**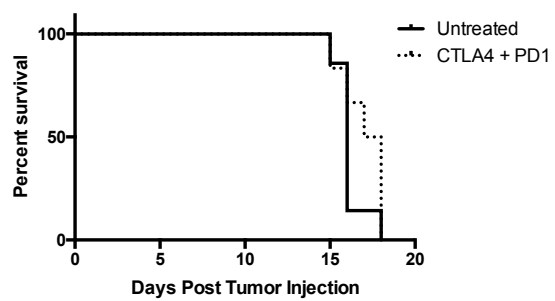

**Supplemental Figure S6: PD-1 and CTLA-4 inhibition do not increase survival in T12 claudin-low tumor bearing mice.** WT mice were injected in  $1 \times 10^5$  T12 tumor cells. **(A)** Growth curves of T12 tumor bearing mice receiving anti-PD-1 and anti-CTLA-4. **(B)** Survival analysis of data presented in **(A)** (n=6 for each group).

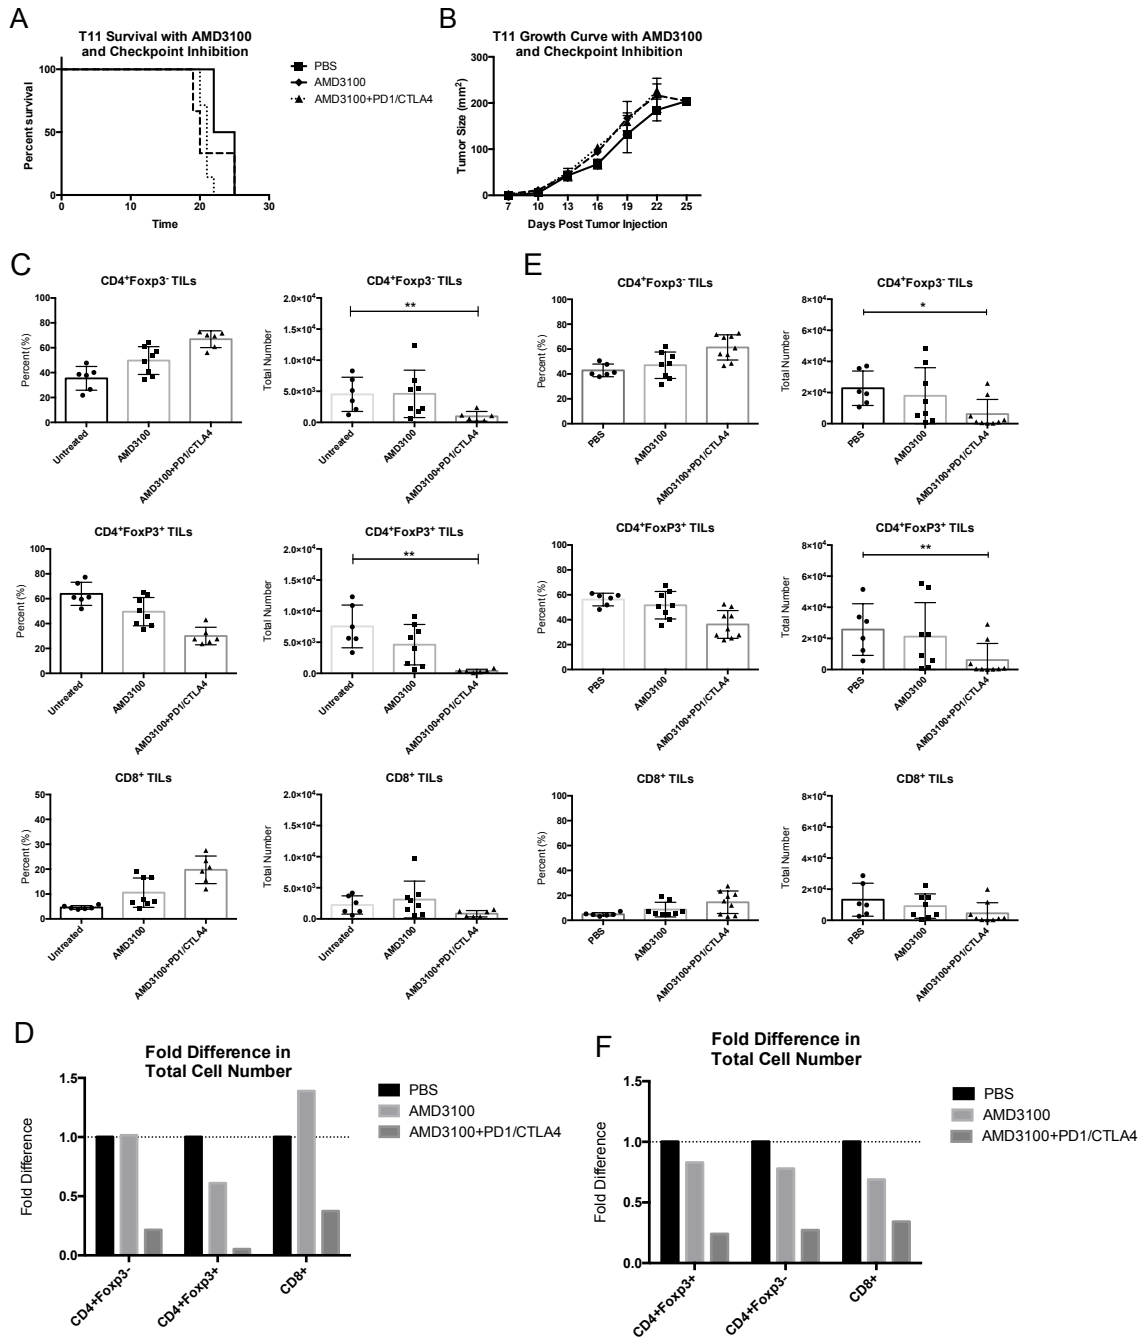

**Supplemental Figure S7: CXCR4/CXCL12 blockade does not delay T11 tumor growth or enhance survival.** WT mice were implanted on day -2 with osmotic pumps loaded with PBS or 10 mg AMD3100 in PBS (PBS n = 6, AMD3100 n=8, AMD3100+PD1/CTLA4 n=9) and challenged with  $1 \times 10^4$  T11 cells. **(A)** Growth curves of T11 tumor bearing mice receiving AMD3100 with or without anti-PD-1 and anti-CTLA-4. **(B)** Survival analysis of data presented in **(A)**. **(C-D)** Tumors harvested on day 12 PTI and FACS analyzed. **(C)** Percent and total number of CD4<sup>+</sup>Foxp3<sup>+</sup>, CD4<sup>+</sup>Foxp3<sup>+</sup>, and CD8<sup>+</sup> TILs. **(D)** The fold difference in the total number of TILs normalized to PBS group. **(E-F)** Tumors harvested on day 16 PTI and FACS analyzed. **(E)** Percent and total number of CD4<sup>+</sup>Foxp3<sup>+</sup>, CD4<sup>+</sup>Foxp3<sup>+</sup>, and CD8<sup>+</sup> TILs. **(F)** The fold difference in the total number of TILs normalized to PBS group. Statistical significance determined by Kruskal-Wallis test with Dunn's post-test for multiple comparisons. \* denotes  $p < 0.05$ , \*\* denotes  $p < 0.01$ .



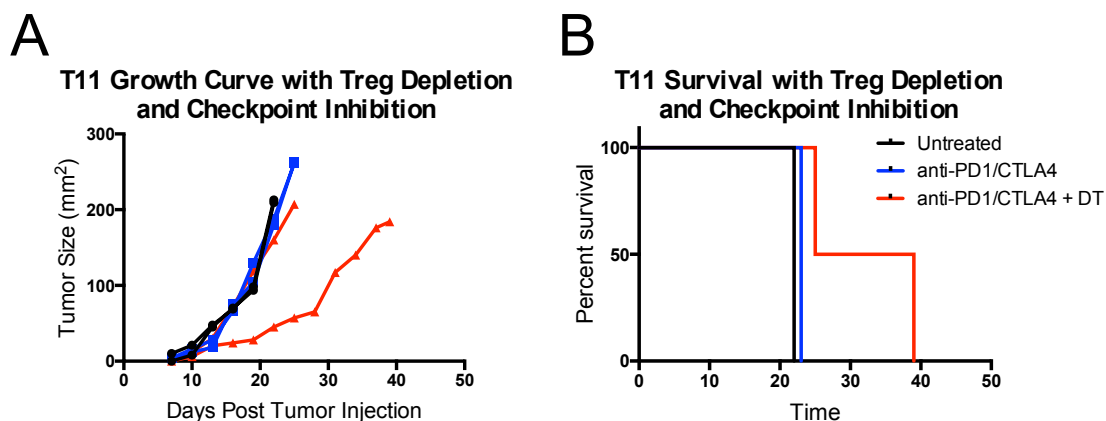

**Supplemental Figure S8: Regulatory T cell depletion after tumor establishment with anti-PD-1 and anti-CTLA-4 immune checkpoint inhibition delays T11 tumor growth.** WT or FoxP3-DTR mice were injected with  $1 \times 10^4$  T11 cells. DERE mice received 1  $\mu$ g diphtheria toxin (DT) on day 6, 7, 13, and 14 PTI. DT + PD-1 + CTLA4 mice received 1  $\mu$ g DT on day 6, 7, 13, and 14 PTI, and anti-PD-1 and anti-CTLA4 antibody on day -1 then every other day for the duration of the experiment. **(A)** Individual replicates of tumor growth curves. **(B)** Mice depleted of  $T_{reg}$ s and receiving anti-PD-1 and anti-CTLA4 ( $n = 2$ ) have a non-significant survival benefit compared to untreated ( $n=2$ ) or anti-PD-1 and anti-CTLA4 alone ( $n = 2$ ).

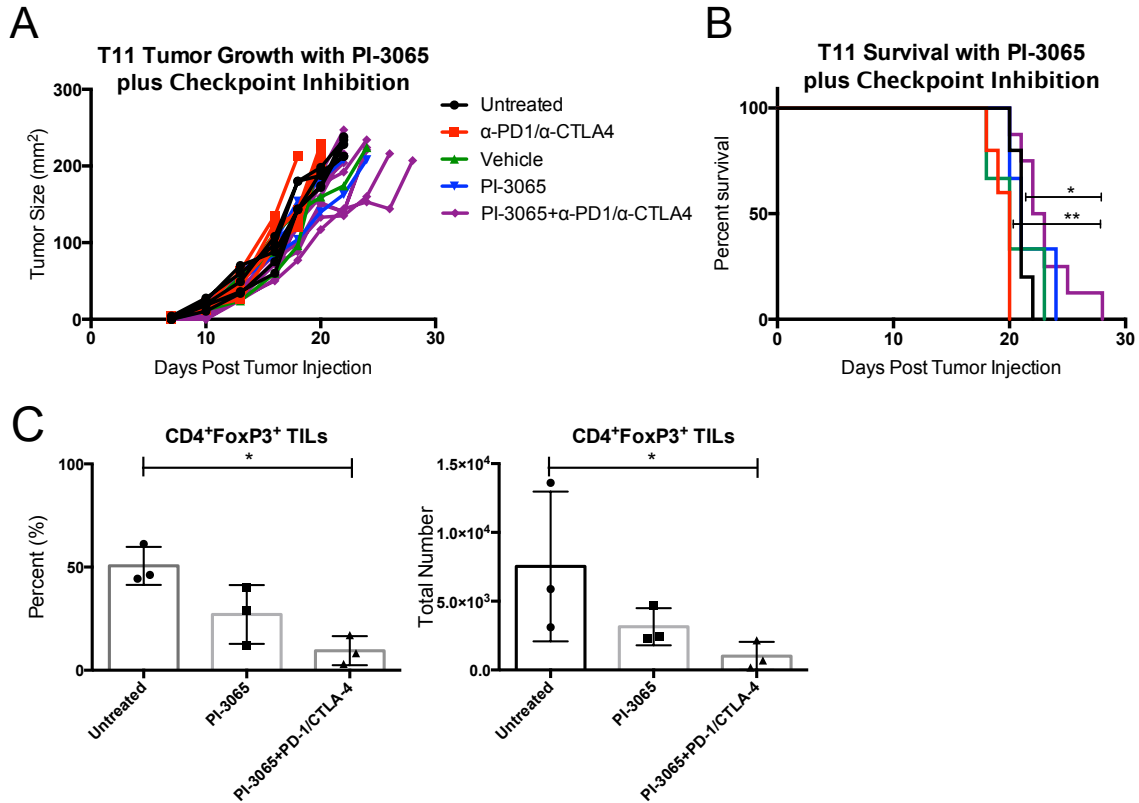

**Supplemental Figure S9: Selective inhibition of PI3K family member p110 $\delta$  by PI-3065 combined with checkpoint inhibition slightly delays T11 tumor growth and improves survival.** WT mice were injected with  $1 \times 10^4$  T11 cells. Mice receiving PI-3065 or vehicle were given 75mg/kg of PI-3065 or vehicle only daily by oral gavage. Anti-PD1 + anti-CTLA4 mice received anti-PD1 and anti-CTLA4 antibody on day -1 then every other day for the duration of the experiment. **(A)** Individual replicates of tumor growth curves. **(B)** Mice receiving PI-3065 anti-PD1 and anti-CTLA4 ( $n = 8$ ) have a significant survival benefit compared to untreated ( $n=5$ ) and anti-PD1 and anti-CTLA4 alone ( $n = 5$ ) (untreated vs. PI-3065 + anti-PD1/CTLA4:  $p=0.0415$ , anti-PD1/CTLA4 vs PI-3065 + anti-PD1/CTLA4):  $p = 0.0015$ . Statistical significance of survival determined by log-rank test. **(C)** Percent and total number CD4<sup>+</sup>FoxP3<sup>+</sup> T<sub>regs</sub> isolated from the tumor at day 18 PTI in untreated mice ( $n=3$ ) compared to mice treated with PI-3065 alone ( $n=3$ ) or PI-3065 plus anti-PD-1 and anti-CTLA4 ( $n=3$ ). Statistical significance determined by Kruskal-Wallis test with Dunn's post-test for multiple comparisons. \* denotes  $p < 0.05$ .
